# Supplementary material for: Effect of anion dimensionality on optical properties: the ∞[B7O10(OH)2] layer in CsB7O10(OH)2vs. the ∞[B7O12] framework in CsBaB7O12
Source: Royal Society of Chemistry journal article supplement (doi:10.1039/c9dt04539b), 2019-12-30
Supplement: c9dt04539b1.pdf [file c9dt04539b1.pdf]

## Electronic Supplementary Information

### Effect of Anion Dimensionality on Optical Properties: $\infty[\text{B}_7\text{O}_{10}(\text{OH})_2]$

#### Layer in $\text{CsB}_7\text{O}_{10}(\text{OH})_2$ vs $\infty[\text{B}_7\text{O}_{12}]$ Framework in $\text{CsBaB}_7\text{O}_{12}$

Zhaohong Miao,<sup>a,b#</sup> Yun Yang,<sup>a#</sup> Zhonglei Wei,<sup>a,b</sup> Zhihua Yang<sup>a</sup> and Shilie Pan<sup>a\*</sup>

<sup>a</sup>CAS Key Laboratory of Functional Materials and Devices for Special Environments, Xinjiang

Technical Institute of Physics & Chemistry, CAS; Xinjiang Key Laboratory of Electronic Information

Materials and Devices, 40-1 South Beijing Road, Urumqi 830011, China;

<sup>b</sup>Center of Materials Science and Optoelectronics Engineering, University of Chinese

Academy of Sciences, Beijing 100049, China.

E-mail: [slpan@ms.xjb.ac.cn](mailto:slpan@ms.xjb.ac.cn)

### Contents

#### Reagents

**Table S1** Atomic coordinates ( $\times 10^4$ ), equivalent isotropic displacement parameters ( $\text{\AA}^2 \times 10^3$ ) and bond valence sums (BVSs) for  $\text{CsB}_7\text{O}_{10}(\text{OH})_2$  (a) and  $\text{CsBaB}_7\text{O}_{12}$  (b).

**Table S2** Bond lengths [ $\text{\AA}$ ] and angles [ $^\circ$ ] for  $\text{CsB}_7\text{O}_{10}(\text{OH})_2$  (a) and  $\text{CsBaB}_7\text{O}_{12}$  (b).

**Table S3** Disorder-free alkali- and/or alkaline-earth metal cations-containing cesium borates.

**Figure S1.** The crystal photographs of  $\text{CsB}_7\text{O}_{10}(\text{OH})_2$  (a) and  $\text{CsBaB}_7\text{O}_{12}$  (b).

**Figure S2.** (a)  $\infty[\text{CsBaO}_{12}]$  layers; the  $\infty[\text{BaO}_8]$  chain is surrounded by blue circle; the  $[\text{Cs}_2\text{O}_{12}]$  dimer is surrounded by green circle. (b) The 3 D  $\infty[\text{B}_7\text{O}_{12}]$  anionic open-framework. (c) The whole 3D framework of  $\text{CsBaB}_7\text{O}_{12}$ .

**Figure S3.** The fundamental building blocks (FBBs) of the investigated compounds.

**Figure S4.** The anionic structures of the investigated compounds.

**Figure S5.** TG-DSC curves of  $\text{CsB}_7\text{O}_{10}(\text{OH})_2$ .

**Figure S6.** (a) The IR spectrum of  $\text{CsB}_7\text{O}_{10}(\text{OH})_2$ . (b) The IR spectrum of  $\text{CsBaB}_7\text{O}_{12}$ .

#### Reference

## Reagents

CsF (Tianjin Baishi Chemical Reagent Co., Ltd, 99.5%), BaF<sub>2</sub> (Aladdin Reagent Co., Ltd., 99.99%), H<sub>3</sub>BO<sub>3</sub> (Tianjin Baishi Chemical Reagent Co., Ltd, 99.5%), Na<sub>2</sub>CO<sub>3</sub> (Shanghai Aladdin Reagent Co., Ltd., 99.5%), BaCO<sub>3</sub> (Shanghai Aladdin Reagent, Ltd., 99.0%), B<sub>2</sub>O<sub>3</sub> (Shanghai Aladdin Reagent Co., Ltd., 98.0%), PbO (Tianjin Baishi Chemical Reagent Co., Ltd, 99.0%) and Cs<sub>2</sub>CO<sub>3</sub> (Tianjin Baishi Chemical Reagent Co., Ltd, 99.0%) were of analytical grade and were obtained from commercial sources without further purification.

**Table S1.** (a) Atomic coordinates ( $\times 10^4$ ), equivalent isotropic displacement parameters ( $\text{\AA}^2 \times 10^3$ ) and bond valence sums (BVSs) for  $\text{CsB}_7\text{O}_{10}(\text{OH})_2$ .

| Atoms | x       | y       | z       | U(eq) | BVS   |
|-------|---------|---------|---------|-------|-------|
| Cs(1) | 10000   | 8134(1) | 7500    | 25(1) | 1.110 |
| B(1)  | 5000    | 2787(4) | 2500    | 18(1) | 3.060 |
| B(2)  | 5777(3) | 3381(3) | 4482(3) | 19(1) | 3.050 |
| B(3)  | 7739(3) | 5051(3) | 5345(2) | 18(1) | 3.073 |
| B(4)  | 8903(3) | 6655(3) | 4044(3) | 19(1) | 3.059 |
| O(1)  | 5773(2) | 3664(2) | 3388(1) | 20(1) | 1.996 |
| O(2)  | 6655(2) | 4047(2) | 5350(2) | 24(1) | 2.073 |
| O(3)  | 7878(2) | 5738(2) | 4365(2) | 24(1) | 2.090 |
| O(4)  | 8627(2) | 5347(2) | 6313(2) | 31(1) | 1.926 |
| O(5)  | 8888(2) | 6869(2) | 2935(2) | 20(1) | 1.880 |
| O(6)  | 9864(2) | 7363(2) | 4846(2) | 26(1) | 2.032 |

**Table S1.** (b) Atomic coordinates ( $\times 10^4$ ), equivalent isotropic displacement parameters ( $\text{\AA}^2 \times 10^3$ ) and bond valence sums (BVSs) for  $\text{CsBaB}_7\text{O}_{12}$ .

| Atoms | x        | y       | z        | U(eq) | BVS   |
|-------|----------|---------|----------|-------|-------|
| Ba(1) | 4774(1)  | 2552(1) | 1122(1)  | 15(1) | 1.922 |
| Cs(1) | 136(1)   | 2558(1) | -19(1)   | 22(1) | 1.051 |
| B(1)  | -2533(5) | 4641(6) | 503(4)   | 12(1) | 3.071 |
| B(2)  | 2992(5)  | 5573(6) | 1648(4)  | 10(1) | 3.049 |
| B(3)  | 3996(5)  | 1242(6) | -1713(4) | 11(1) | 3.065 |
| B(4)  | 2866(5)  | 1215(6) | 2961(5)  | 14(1) | 3.049 |
| B(5)  | 1798(5)  | 4899(6) | 2942(5)  | 12(1) | 3.042 |
| B(6)  | -3719(5) | 2427(6) | -643(4)  | 10(1) | 3.061 |
| B(7)  | 692(6)   | 86(6)   | 2596(5)  | 12(1) | 3.071 |
| O(1)  | -629(3)  | -70(4)  | 1806(3)  | 15(1) | 2.057 |
| O(2)  | 1595(3)  | 737(4)  | 2177(3)  | 16(1) | 2.082 |
| O(3)  | 2898(3)  | 851(4)  | -1290(3) | 13(1) | 1.743 |
| O(4)  | 5244(3)  | 1450(3) | -714(3)  | 11(1) | 2.131 |
| O(5)  | 3537(3)  | 2288(3) | 2606(3)  | 12(1) | 2.088 |
| O(6)  | 4185(3)  | 4906(3) | 2549(3)  | 10(1) | 2.043 |
| O(7)  | 2674(3)  | 4735(3) | 586(3)   | 13(1) | 2.09  |
| O(8)  | 1804(3)  | 5583(4) | 1991(3)  | 14(1) | 2.055 |
| O(9)  | -1084(3) | 4656(3) | 1312(3)  | 12(1) | 2.102 |
| O(10) | -3367(3) | 5620(4) | 968(3)   | 17(1) | 1.919 |
| O(11) | -3063(3) | 3074(4) | 416(2)   | 12(1) | 2.032 |
| O(12) | -3369(3) | 2790(3) | -1537(3) | 11(1) | 2.013 |

**Table S2.** (a) Bond lengths [Å] and angles [°] for CsB<sub>7</sub>O<sub>10</sub>(OH)<sub>2</sub>.

|                     |           |                     |            |
|---------------------|-----------|---------------------|------------|
| Cs(1)-O(1)#1        | 3.291(2)  | O(4)#5-Cs(1)-O(1)#1 | 167.23(5)  |
| Cs(1)-O(1)#2        | 3.291(2)  | O(4)-Cs(1)-O(1)#2   | 167.23(5)  |
| Cs(1)-O(2)#3        | 3.269(2)  | O(4)#5-Cs(1)-O(1)#2 | 125.74(6)  |
| Cs(1)-O(2)#4        | 3.269(2)  | O(4)-Cs(1)-O(1)#1   | 125.74(6)  |
| Cs(1)-O(3)#1        | 3.369(2)  | O(4)-Cs(1)-O(2)#3   | 112.23(6)  |
| Cs(1)-O(3)#2        | 3.369(2)  | O(4)#5-Cs(1)-O(2)#3 | 93.98(6)   |
| Cs(1)-O(4)          | 3.195(2)  | O(4)#5-Cs(1)-O(2)#4 | 112.23(6)  |
| Cs(1)-O(4)#5        | 3.195(2)  | O(4)-Cs(1)-O(2)#4   | 93.98(6)   |
| Cs(1)-O(5)#1        | 3.498(3)  | O(4)#5-Cs(1)-O(3)#1 | 141.35(5)  |
| Cs(1)-O(5)#2        | 3.498(3)  | O(4)#5-Cs(1)-O(3)#2 | 75.86(6)   |
| Cs(1)-O(6)          | 3.239(2)  | O(4)-Cs(1)-O(3)#2   | 141.35(5)  |
| Cs(1)-O(6)#5        | 3.239(2)  | O(4)-Cs(1)-O(3)#1   | 75.86(6)   |
| B(1)-O(1)           | 1.455(3)  | O(4)#5-Cs(1)-O(4)   | 66.56(8)   |
| B(1)-O(1)#6         | 1.455(3)  | O(4)#5-Cs(1)-O(5)#1 | 112.93(5)  |
| B(1)-O(5)#7         | 1.486(3)  | O(4)#5-Cs(1)-O(5)#2 | 67.00(5)   |
| B(1)-O(5)#8         | 1.486(3)  | O(4)-Cs(1)-O(5)#1   | 67.00(5)   |
| B(2)-O(1)           | 1.333(3)  | O(4)-Cs(1)-O(5)#2   | 112.93(5)  |
| B(2)-O(2)           | 1.374(3)  | O(4)-Cs(1)-O(6)#5   | 101.71(6)  |
| B(2)-O(6)#7         | 1.389(3)  | O(4)#5-Cs(1)-O(6)#5 | 54.26(5)   |
| B(3)-O(2)           | 1.377(3)  | O(4)#5-Cs(1)-O(6)   | 101.71(6)  |
| B(3)-O(3)           | 1.363(3)  | O(4)-Cs(1)-O(6)     | 54.26(5)   |
| B(3)-O(4)           | 1.346(3)  | O(5)#2-Cs(1)-O(5)#1 | 179.92(6)  |
| B(4)-O(3)           | 1.373(3)  | O(6)-Cs(1)-O(1)#1   | 85.41(5)   |
| B(4)-O(5)           | 1.338(4)  | O(6)#5-Cs(1)-O(1)#1 | 120.34(5)  |
| B(4)-O(6)           | 1.381(3)  | O(6)#5-Cs(1)-O(1)#2 | 85.41(5)   |
| O(1)#2-Cs(1)-O(1)#1 | 42.31(7)  | O(6)-Cs(1)-O(1)#2   | 120.34(5)  |
| O(1)#1-Cs(1)-O(3)#2 | 91.43(5)  | O(6)-Cs(1)-O(2)#3   | 150.43(5)  |
| O(1)#1-Cs(1)-O(3)#1 | 51.41(4)  | O(6)-Cs(1)-O(2)#4   | 41.61(5)   |
| O(1)#2-Cs(1)-O(3)#2 | 51.41(4)  | O(6)#5-Cs(1)-O(2)#4 | 150.43(5)  |
| O(1)#2-Cs(1)-O(3)#1 | 91.43(5)  | O(6)#5-Cs(1)-O(2)#3 | 41.61(5)   |
| O(1)#1-Cs(1)-O(5)#2 | 102.40(4) | O(6)-Cs(1)-O(3)#1   | 60.36(6)   |
| O(1)#2-Cs(1)-O(5)#2 | 77.68(4)  | O(6)#5-Cs(1)-O(3)#2 | 60.35(6)   |
| O(1)#2-Cs(1)-O(5)#1 | 102.40(4) | O(6)#5-Cs(1)-O(3)#1 | 129.86(5)  |
| O(1)#1-Cs(1)-O(5)#1 | 77.68(4)  | O(6)-Cs(1)-O(3)#2   | 129.86(5)  |
| O(2)#3-Cs(1)-O(1)#2 | 66.32(5)  | O(6)-Cs(1)-O(5)#1   | 87.32(4)   |
| O(2)#4-Cs(1)-O(1)#2 | 84.39(5)  | O(6)#5-Cs(1)-O(5)#2 | 87.32(4)   |
| O(2)#4-Cs(1)-O(1)#1 | 66.32(5)  | O(6)#5-Cs(1)-O(5)#1 | 92.67(4)   |
| O(2)#3-Cs(1)-O(1)#1 | 84.39(5)  | O(6)-Cs(1)-O(5)#2   | 92.67(4)   |
| O(2)#3-Cs(1)-O(2)#4 | 148.94(7) | O(6)-Cs(1)-O(6)#5   | 153.65(7)  |
| O(2)#4-Cs(1)-O(3)#2 | 91.95(6)  | O(1)-B(1)-O(5)#7    | 111.75(10) |

|                     |           |                    |            |
|---------------------|-----------|--------------------|------------|
| O(2)#4-Cs(1)-O(3)#1 | 78.12(6)  | O(1)-B(1)-O(5)#8   | 108.27(11) |
| O(2)#3-Cs(1)-O(3)#2 | 78.12(6)  | O(1)#6-B(1)-O(5)#7 | 108.27(11) |
| O(2)#3-Cs(1)-O(3)#1 | 91.95(6)  | O(5)#7-B(1)-O(5)#8 | 107.4(3)   |
| O(2)#4-Cs(1)-O(5)#1 | 116.62(5) | O(1)-B(2)-O(2)     | 124.5(2)   |
| O(2)#3-Cs(1)-O(5)#1 | 63.40(5)  | O(1)-B(2)-O(6)#7   | 121.9(2)   |
| O(2)#4-Cs(1)-O(5)#2 | 63.40(5)  | O(2)-B(2)-O(6)#7   | 113.5(2)   |
| O(2)#3-Cs(1)-O(5)#2 | 116.62(5) | O(3)-B(3)-O(2)     | 119.5(2)   |
| O(3)#2-Cs(1)-O(3)#1 | 142.55(7) | O(4)-B(3)-O(2)     | 119.1(2)   |
| O(3)#2-Cs(1)-O(5)#1 | 140.68(4) | O(4)-B(3)-O(3)     | 121.4(2)   |
| O(3)#1-Cs(1)-O(5)#2 | 140.68(4) | O(3)-B(4)-O(6)     | 120.6(2)   |
| O(3)#1-Cs(1)-O(5)#1 | 39.36(4)  | O(5)-B(4)-O(3)     | 117.3(2)   |
| O(3)#2-Cs(1)-O(5)#2 | 39.36(4)  | O(5)-B(4)-O(6)     | 122.0(2)   |

Symmetry transformations used to generate equivalent atoms:

#1  $-x+3/2, -y+3/2, -z+1$       #2  $x+1/2, -y+3/2, z+1/2$

#3  $-x+3/2, y+1/2, -z+3/2$       #4  $x+1/2, y+1/2, z$

#5  $-x+2, y, -z+3/2$       #6  $-x+1, y, -z+1/2$

#7  $x-1/2, y-1/2, z$       #8  $-x+3/2, y-1/2, -z+1/2$

**Table S2.** (b) Bond lengths [Å] and angles [°] for CsBaB<sub>7</sub>O<sub>12</sub>.

|               |          |                       |           |
|---------------|----------|-----------------------|-----------|
| Ba(1)-O(3)    | 3.286(3) | O(11)#3-Ba(1)-O(6)    | 118.33(8) |
| Ba(1)-O(4)    | 2.727(3) | O(11)#3-Ba(1)-O(6)#1  | 98.12(9)  |
| Ba(1)-O(5)    | 2.680(3) | O(11)#3-Ba(1)-O(7)    | 119.06(9) |
| Ba(1)-O(6)    | 2.948(3) | O(11)#3-Ba(1)-O(10)#4 | 79.78(8)  |
| Ba(1)-O(6)#1  | 2.811(3) | O(12)#5-Ba(1)-O(3)    | 147.38(8) |
| Ba(1)-O(7)    | 2.802(3) | O(12)#5-Ba(1)-O(4)    | 124.37(8) |
| Ba(1)-O(10)#4 | 2.951(3) | O(12)#5-Ba(1)-O(5)    | 66.15(9)  |
| Ba(1)-O(11)#3 | 2.797(3) | O(12)#5-Ba(1)-O(6)    | 70.30(8)  |
| Ba(1)-O(12)#5 | 2.875(3) | O(12)#5-Ba(1)-O(6)#1  | 48.90(8)  |
| Cs(1)-O(1)#6  | 3.309(3) | O(12)#5-Ba(1)-O(7)    | 119.07(8) |
| Cs(1)-O(2)    | 3.052(3) | O(12)#5-Ba(1)-O(10)#4 | 152.83(9) |
| Cs(1)-O(7)    | 3.134(3) | O(12)#5-Ba(1)-O(11)#3 | 91.35(8)  |
| Cs(1)-O(8)#4  | 3.022(3) | O(2)-Cs(1)-O(1)#6     | 97.21(8)  |
| Cs(1)-O(9)    | 3.080(3) | O(7)-Cs(1)-O(1)#6     | 102.42(8) |
| Cs(1)-O(9)#4  | 3.285(3) | O(7)-Cs(1)-O(2)       | 90.09(8)  |
| Cs(1)-O(12)   | 3.475(3) | O(8)#4-Cs(1)-O(1)#6   | 91.16(8)  |
| B(1)-O(7)#4   | 1.433(6) | O(8)#4-Cs(1)-O(2)     | 167.31(8) |
| B(1)-O(9)     | 1.484(6) | O(8)#4-Cs(1)-O(7)     | 97.42(8)  |
| B(1)-O(10)    | 1.499(6) | O(9)#4-Cs(1)-O(1)#6   | 88.99(8)  |
| B(1)-O(11)    | 1.461(6) | O(9)-Cs(1)-O(1)#6     | 165.49(7) |
| B(2)-O(6)     | 1.460(6) | O(9)-Cs(1)-O(2)       | 88.96(8)  |
| B(2)-O(7)     | 1.449(6) | O(9)#4-Cs(1)-O(2)     | 133.57(8) |
| B(2)-O(8)     | 1.481(6) | O(9)-Cs(1)-O(7)       | 90.64(8)  |
| B(2)-O(12)#4  | 1.498(6) | O(9)#4-Cs(1)-O(7)     | 43.93(8)  |

|                      |           |                     |           |
|----------------------|-----------|---------------------|-----------|
| B(3)-O(3)            | 1.493(6)  | O(9)#4-Cs(1)-O(8)#4 | 55.75(7)  |
| B(3)-O(4)            | 1.449(6)  | O(9)-Cs(1)-O(8)#4   | 80.78(8)  |
| B(3)-O(5)#7          | 1.512(6)  | O(12)-Cs(1)-O(1)#6  | 94.32(7)  |
| B(3)-O(6)#7          | 1.431(6)  | O(12)-Cs(1)-O(2)    | 126.51(7) |
| B(4)-O(2)            | 1.396(6)  | O(12)-Cs(1)-O(7)    | 137.46(7) |
| B(4)-O(5)            | 1.349(6)  | O(12)-Cs(1)-O(8)#4  | 42.84(7)  |
| B(4)-O(10)#8         | 1.354(6)  | O(12)-Cs(1)-O(9)#4  | 98.55(7)  |
| B(5)-O(1)#9          | 1.392(6)  | O(12)-Cs(1)-O(9)    | 71.56(7)  |
| B(5)-O(3)#2          | 1.364(6)  | O(9)-B(1)-O(7)#4    | 111.1(4)  |
| B(5)-O(8)            | 1.343(6)  | O(10)-B(1)-O(7)#4   | 107.6(4)  |
| B(6)-O(4)#10         | 1.364(6)  | O(10)-B(1)-O(9)     | 109.6(4)  |
| B(6)-O(11)           | 1.372(6)  | O(11)-B(1)-O(7)#4   | 112.6(4)  |
| B(6)-O(12)           | 1.354(5)  | O(11)-B(1)-O(9)     | 109.0(4)  |
| B(7)-O(1)            | 1.381(6)  | O(11)-B(1)-O(10)    | 106.9(4)  |
| B(7)-O(2)            | 1.381(6)  | O(7)-B(2)-O(6)      | 110.4(4)  |
| B(7)-O(9)#8          | 1.334(6)  | O(8)-B(2)-O(6)      | 110.7(4)  |
| O(4)-Ba(1)-O(3)      | 45.17(8)  | O(8)-B(2)-O(7)      | 110.7(4)  |
| O(5)-Ba(1)-O(3)      | 109.09(8) | O(12)#4-B(2)-O(6)   | 105.5(4)  |
| O(5)-Ba(1)-O(4)      | 149.78(9) | O(12)#4-B(2)-O(7)   | 111.5(4)  |
| O(6)#1-Ba(1)-O(3)    | 98.49(8)  | O(12)#4-B(2)-O(8)   | 108.0(4)  |
| O(6)-Ba(1)-O(3)      | 133.24(8) | O(4)-B(3)-O(3)      | 107.0(4)  |
| O(6)-Ba(1)-O(4)      | 156.20(8) | O(5)#7-B(3)-O(3)    | 105.7(3)  |
| O(6)#1-Ba(1)-O(4)    | 93.72(9)  | O(5)#7-B(3)-O(4)    | 112.2(4)  |
| O(6)-Ba(1)-O(5)      | 49.84(8)  | O(6)#7-B(3)-O(3)    | 113.5(4)  |
| O(6)#1-Ba(1)-O(5)    | 72.33(9)  | O(6)#7-B(3)-O(4)    | 110.2(4)  |
| O(7)-Ba(1)-O(3)      | 86.38(8)  | O(6)#7-B(3)-O(5)#7  | 108.1(4)  |
| O(7)-Ba(1)-O(4)      | 114.73(9) | O(5)-B(4)-O(2)      | 117.3(4)  |
| O(7)-Ba(1)-O(5)      | 70.75(9)  | O(10)#8-B(4)-O(2)   | 119.9(4)  |
| O(7)-Ba(1)-O(6)#1    | 142.26(8) | O(10)#8-B(4)-O(5)   | 122.8(4)  |
| O(7)-Ba(1)-O(6)      | 49.01(8)  | O(3)#2-B(5)-O(1)#9  | 116.1(4)  |
| O(10)#4-Ba(1)-O(3)   | 59.43(8)  | O(8)-B(5)-O(1)#9    | 120.4(4)  |
| O(10)#4-Ba(1)-O(4)   | 67.72(9)  | O(8)-B(5)-O(3)#2    | 123.5(4)  |
| O(10)#4-Ba(1)-O(5)   | 117.23(8) | O(11)-B(6)-O(4)#10  | 114.4(4)  |
| O(10)#4-Ba(1)-O(6)   | 91.27(8)  | O(12)-B(6)-O(4)#10  | 124.1(4)  |
| O(10)#4-Ba(1)-O(6)#1 | 157.41(9) | O(12)-B(6)-O(11)    | 121.4(4)  |
| O(10)#4-Ba(1)-O(7)   | 48.49(8)  | O(2)-B(7)-O(1)      | 115.0(4)  |
| O(11)#3-Ba(1)-O(3)   | 93.18(8)  | O(9)#8-B(7)-O(1)    | 123.4(4)  |
| O(11)#3-Ba(1)-O(4)   | 49.18(9)  | O(9)#8-B(7)-O(2)    | 121.7(4)  |
| O(11)#3-Ba(1)-O(5)   | 156.64(9) |                     |           |

Symmetry transformations used to generate equivalent atoms:

#1  $x+1,y,z$       #2  $-x+1,y-1/2,-z+1/2$       #3  $x+1,-y+1/2,z+1/2$

#4  $-x, -y+1, -z$     #5  $x, -y+1/2, z+1/2$     #6  $-x, -y, -z$   
#7  $-x, y-1/2, -z+1/2$     #8  $-x, y+1/2, -z+1/2$   
#9  $x-1, y, z$     #10  $x, -y+1/2, z-1/2$

**Table S3.** Disorder-free alkali- and/or alkaline-earth metal cations-containing caesium borates.

| NO | Compound                                                                                                           | Space group                                     | M/B   | FBBs                                               | Anionic Groups                                                    |
|----|--------------------------------------------------------------------------------------------------------------------|-------------------------------------------------|-------|----------------------------------------------------|-------------------------------------------------------------------|
| 1  | Cs <sub>4</sub> Mg <sub>4</sub> (BO <sub>3</sub> ) <sub>4</sub> <sup>1</sup>                                       | <i>P2<sub>1</sub>/c</i>                         | 2     | BO <sub>3</sub>                                    | 0D Isolated BO <sub>3</sub> Unit                                  |
| 2  | CsNa <sub>2</sub> (BO <sub>3</sub> ) <sub>2</sub>                                                                  | <i>Pmnm</i>                                     | 3     | BO <sub>3</sub>                                    | 0D Isolated BO <sub>3</sub> Unit                                  |
| 3  | Na <sub>2</sub> CsBe <sub>6</sub> B <sub>5</sub> O <sub>15</sub> <sup>3</sup>                                      | <i>C2/c</i>                                     | 1.8   | BO <sub>3</sub>                                    | 0D Isolated BO <sub>3</sub> Unit                                  |
| 4  | Cs <sub>3</sub> (BO <sub>3</sub> ) <sub>4</sub>                                                                    | <i>Pbam</i>                                     | 3     | BO <sub>3</sub>                                    | 0D Isolated BO <sub>3</sub> Unit                                  |
| 5  | CsBe <sub>4</sub> (BO <sub>3</sub> ) <sub>3</sub> <sup>5</sup>                                                     | <i>Pnma</i>                                     | 1.667 | BO <sub>3</sub>                                    | 0D Isolated BO <sub>3</sub> Unit                                  |
| 6  | CsCaBO <sub>3</sub> <sup>6</sup>                                                                                   | <i>P2<sub>1</sub>3</i>                          | 2     | BO <sub>3</sub>                                    | 0D Isolated BO <sub>3</sub> Unit                                  |
| 7  | Cs[B(OH) <sub>4</sub> ] <sub>2</sub> ·2H <sub>2</sub> O <sup>7</sup>                                               | <i>I<sup>-</sup>4</i>                           | 1     | B(OH) <sub>4</sub>                                 | 0D Isolated B(OH) <sub>4</sub>                                    |
| 8  | CsLi <sub>5</sub> (BO <sub>3</sub> ) <sub>2</sub> <sup>8</sup>                                                     | <i>C2/c</i>                                     | 3     | BO <sub>3</sub>                                    | 0D Isolated BO <sub>3</sub> Unit                                  |
| 9  | Cs <sub>3</sub> Na[Li <sub>2</sub> (BO <sub>3</sub> ) <sub>2</sub> ] <sup>9</sup>                                  | <i>P<sup>-</sup>1</i>                           | 3     | BO <sub>3</sub>                                    | 0D Isolated BO <sub>3</sub> Unit                                  |
| 10 | CsBO <sub>2</sub> <sup>10</sup>                                                                                    | <i>R<sup>-</sup>3c</i>                          | 1     | B <sub>3</sub> O <sub>6</sub>                      | 0D Isolated B <sub>3</sub> O <sub>6</sub> Ring                    |
| 11 | CsBaB <sub>3</sub> O <sub>6</sub> <sup>11</sup>                                                                    | <i>P321</i>                                     | 0.667 | B <sub>3</sub> O <sub>6</sub>                      | 0D Isolated B <sub>3</sub> O <sub>6</sub> Ring                    |
| 12 | Cs <sub>2</sub> (B <sub>3</sub> O <sub>5</sub> ) <sub>2</sub> <sup>12</sup>                                        | <i>P2<sub>1</sub>2<sub>1</sub>2<sub>1</sub></i> | 0.333 | B <sub>3</sub> O <sub>7</sub>                      | 3D B <sub>3</sub> O <sub>5</sub> Framework                        |
| 13 | CsLiB <sub>6</sub> O <sub>10</sub> <sup>13-15</sup>                                                                | <i>I<sup>-</sup>42d</i>                         | 0.333 | B <sub>3</sub> O <sub>7</sub>                      | 3D B <sub>3</sub> O <sub>5</sub> Framework                        |
| 14 | Cs <sub>2</sub> (B <sub>3</sub> O <sub>5</sub> ) <sub>2</sub> <sup>16</sup>                                        | <i>P2<sub>1</sub>2<sub>1</sub>2<sub>1</sub></i> | 0.333 | B <sub>3</sub> O <sub>7</sub>                      | 3D B <sub>3</sub> O <sub>5</sub> Framework                        |
| 15 | NaCs[B <sub>4</sub> O <sub>5</sub> (OH) <sub>4</sub> ] <sub>2</sub> ·4H <sub>2</sub> O <sup>17</sup>               | <i>P2<sub>1</sub>/c</i>                         | 0.5   | B <sub>4</sub> O <sub>5</sub> (OH) <sub>4</sub>    | 0D Isolated B <sub>4</sub> O <sub>5</sub> (OH) <sub>4</sub> Unit  |
| 16 | Cs <sub>2</sub> Ca[B <sub>4</sub> O <sub>5</sub> (OH) <sub>4</sub> ] <sub>2</sub> ·8H <sub>2</sub> O <sup>18</sup> | <i>P2<sub>1</sub>2<sub>1</sub>2<sub>1</sub></i> | 0.375 | B <sub>4</sub> O <sub>5</sub> (OH) <sub>4</sub>    | 0D Isolated B <sub>4</sub> O <sub>5</sub> (OH) <sub>4</sub> Unit  |
| 17 | Cs <sub>2</sub> [B <sub>4</sub> O <sub>5</sub> (OH) <sub>4</sub> ] <sub>2</sub> ·3H <sub>2</sub> O <sup>19</sup>   | <i>P2<sub>1</sub>/c</i>                         | 0.5   | B <sub>4</sub> O <sub>5</sub> (OH) <sub>4</sub>    | 0D Isolated B <sub>4</sub> O <sub>5</sub> (OH) <sub>4</sub> Unit  |
| 18 | Li <sub>3</sub> Cs <sub>2</sub> B <sub>5</sub> O <sub>10</sub> <sup>20</sup>                                       | <i>C222<sub>1</sub></i>                         | 1     | B <sub>5</sub> O <sub>10</sub>                     | 0D Isolated B <sub>5</sub> O <sub>10</sub> Unit                   |
| 19 | Na <sub>2</sub> Cs <sub>2</sub> B <sub>20</sub> O <sub>32</sub> <sup>21</sup>                                      | <i>C2/c</i>                                     | 0.2   | B <sub>5</sub> O <sub>10</sub>                     | 3D B <sub>5</sub> O <sub>8</sub> Framework                        |
| 20 | Cs[B <sub>5</sub> O <sub>6</sub> (OH) <sub>4</sub> ] <sub>2</sub> ·2H <sub>2</sub> O <sup>22, 23</sup>             | <i>C2/c</i>                                     | 0.2   | B <sub>5</sub> O <sub>6</sub> (OH) <sub>4</sub>    | 0D Isolated B <sub>5</sub> O <sub>6</sub> (OH) <sub>4</sub> Unit  |
| 21 | K <sub>3</sub> CsB <sub>20</sub> O <sub>32</sub> <sup>24</sup>                                                     | <i>Pbca</i>                                     | 0.2   | B <sub>5</sub> O <sub>10</sub>                     | 3D B <sub>20</sub> O <sub>32</sub> Framework                      |
| 22 | α-CsB <sub>5</sub> O <sub>8</sub> <sup>25, 26</sup>                                                                | <i>P2<sub>1</sub>/c</i>                         | 0.2   | B <sub>5</sub> O <sub>10</sub>                     | 3D B <sub>5</sub> O <sub>8</sub> Framework                        |
| 23 | β-CsB <sub>5</sub> O <sub>8</sub> <sup>26, 27</sup>                                                                | <i>Pbca</i>                                     | 0.2   | B <sub>5</sub> O <sub>10</sub>                     | 3D B <sub>5</sub> O <sub>8</sub> Framework                        |
| 24 | γ-CsB <sub>5</sub> O <sub>8</sub> <sup>26</sup>                                                                    | <i>Pbca</i>                                     | 0.2   | B <sub>5</sub> O <sub>10</sub>                     | 3D B <sub>5</sub> O <sub>8</sub> Framework                        |
| 25 | HP- CsB <sub>5</sub> O <sub>8</sub> <sup>28</sup>                                                                  | <i>Pnma</i>                                     | 0.2   | B <sub>5</sub> O <sub>11</sub>                     | 3D B <sub>5</sub> O <sub>8</sub> Framework                        |
| 26 | Cs <sub>2</sub> Na <sub>2</sub> B <sub>10</sub> O <sub>17</sub> <sup>29</sup>                                      | <i>C2/c</i>                                     | 0.4   | B <sub>5</sub> O <sub>11</sub>                     | 2D B <sub>10</sub> O <sub>17</sub> Layer                          |
| 27 | Cs <sub>2</sub> K <sub>2</sub> B <sub>10</sub> O <sub>17</sub> <sup>29</sup>                                       | <i>C2/c</i>                                     | 0.4   | B <sub>5</sub> O <sub>11</sub>                     | 2D B <sub>10</sub> O <sub>17</sub> Layer                          |
| 28 | Li <sub>5</sub> Cs <sub>2</sub> B <sub>7</sub> O <sub>14</sub> <sup>30</sup>                                       | <i>Ama2</i>                                     | 1     | B <sub>5</sub> O <sub>12</sub> and BO <sub>3</sub> | 1D B <sub>5</sub> O <sub>10</sub> Chain and BO <sub>2</sub> Chain |
| 29 | Li <sub>4</sub> Cs <sub>3</sub> B <sub>7</sub> O <sub>14</sub> <sup>31</sup>                                       | <i>P3<sub>1</sub>21</i>                         | 1     | B <sub>7</sub> O <sub>14</sub>                     | 0D Isolated B <sub>7</sub> O <sub>14</sub> Unit                   |
| 30 | α-CsB <sub>9</sub> O <sub>14</sub> <sup>32</sup>                                                                   | <i>P222<sub>1</sub></i>                         | 0.111 | B <sub>9</sub> O <sub>17</sub>                     | 3D B <sub>9</sub> O <sub>14</sub> Framework                       |
| 31 | β-CsB <sub>9</sub> O <sub>14</sub> <sup>33</sup>                                                                   | <i>P2<sub>1</sub>/c</i>                         | 0.111 | B <sub>9</sub> O <sub>18</sub>                     | 2D B <sub>9</sub> O <sub>14</sub> Layer                           |



|           |                                                                                                               |            |       |                                           |                                                               |
|-----------|---------------------------------------------------------------------------------------------------------------|------------|-------|-------------------------------------------|---------------------------------------------------------------|
| <b>32</b> | $\text{Cs}_2(\text{B}_9\text{O}_{14})_2$ <sup>34</sup>                                                        | $P222_1$   | 0.111 | $\text{B}_9\text{O}_{17}$                 | 3D $\text{B}_9\text{O}_{14}$ Framework                        |
| <b>33</b> | $\text{Na}_2\text{Cs}_2\text{Sr}(\text{B}_9\text{O}_{15})_2$ <sup>35</sup>                                    | $P2_1/c$   | 0.278 | $\text{B}_9\text{O}_{19}$                 | 3D $\text{B}_9\text{O}_{15}$ Framework                        |
| <b>34</b> | $\text{Na}_2\text{Cs}_2\text{BaB}_{18}\text{O}_{30}$ <sup>24</sup>                                            | $Pmn2_1$   | 0.278 | $\text{B}_9\text{O}_{19}$                 | 3D $\text{B}_{18}\text{O}_{30}$ Framework                     |
| <b>35</b> | $\delta\text{-CsB}_5\text{O}_8$ <sup>36</sup>                                                                 | $Pccn$     | 0.2   | $\text{B}_{10}\text{O}_{19}$              | 3D $\text{B}_5\text{O}_8$ Framework                           |
| <b>36</b> | $\text{NaCs}[\text{B}_{10}\text{O}_{14}(\text{OH})_4]$ <sup>37</sup>                                          | $P2/c$     | 0.2   | $\text{B}_{10}\text{O}_{15}(\text{OH})_4$ | 1D $\text{B}_{10}\text{O}_{14}(\text{OH})_4$ Chain            |
| <b>37</b> | $\text{Na}_2\text{Cs}_4\text{Ba}_2[\text{B}_{12}\text{O}_{18}(\text{OH})_6] \cdot 4(\text{OH})$ <sup>38</sup> | $Pmn2_1$   | 0.667 | $\text{B}_{12}\text{O}_{18}(\text{OH})_6$ | 0D Isolated<br>$\text{B}_{12}\text{O}_{18}(\text{OH})_6$ Unit |
| <b>38</b> | $\text{Cs}_3\text{B}_{13}\text{O}_{21}$ <sup>39</sup>                                                         | $C2/c$     | 0.230 | $\text{B}_{26}\text{O}_{51}$              | 3D $\text{B}_{13}\text{O}_{21}$ Layer                         |
| <b>39</b> | $\text{Na}_8\text{CsB}_{21}\text{O}_{36}$ <sup>40</sup>                                                       | $\bar{4}$  | 0.429 | $\text{B}_{21}\text{O}_{44}$              | 3D $\text{B}_{21}\text{O}_{36}$ Framework                     |
| <b>40</b> | $\text{Li}_4\text{Cs}_4\text{B}_{40}\text{O}_{64}$ <sup>21</sup>                                              | $P\bar{1}$ | 0.2   | $\text{B}_{40}\text{O}_{77}$              | 3D $\text{B}_{40}\text{O}_{64}$ Framework                     |
| <b>41</b> | $\text{Cs}_3\text{B}_7\text{O}_{12}$ <sup>41</sup>                                                            | $C2/c$     | 0.429 | $\text{B}_{63}\text{O}_{133}$             | 3D $\text{B}_{63}\text{O}_{108}$<br>Framework                 |

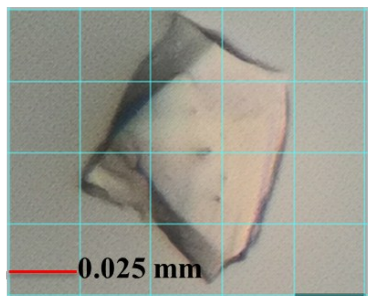

**a**

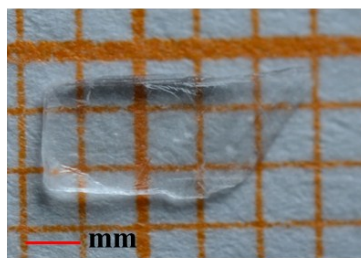

**b**

**Figure S1.** The crystal photographs of CsB<sub>7</sub>O<sub>10</sub>(OH)<sub>2</sub> (a) and CsBaB<sub>7</sub>O<sub>12</sub> (b).

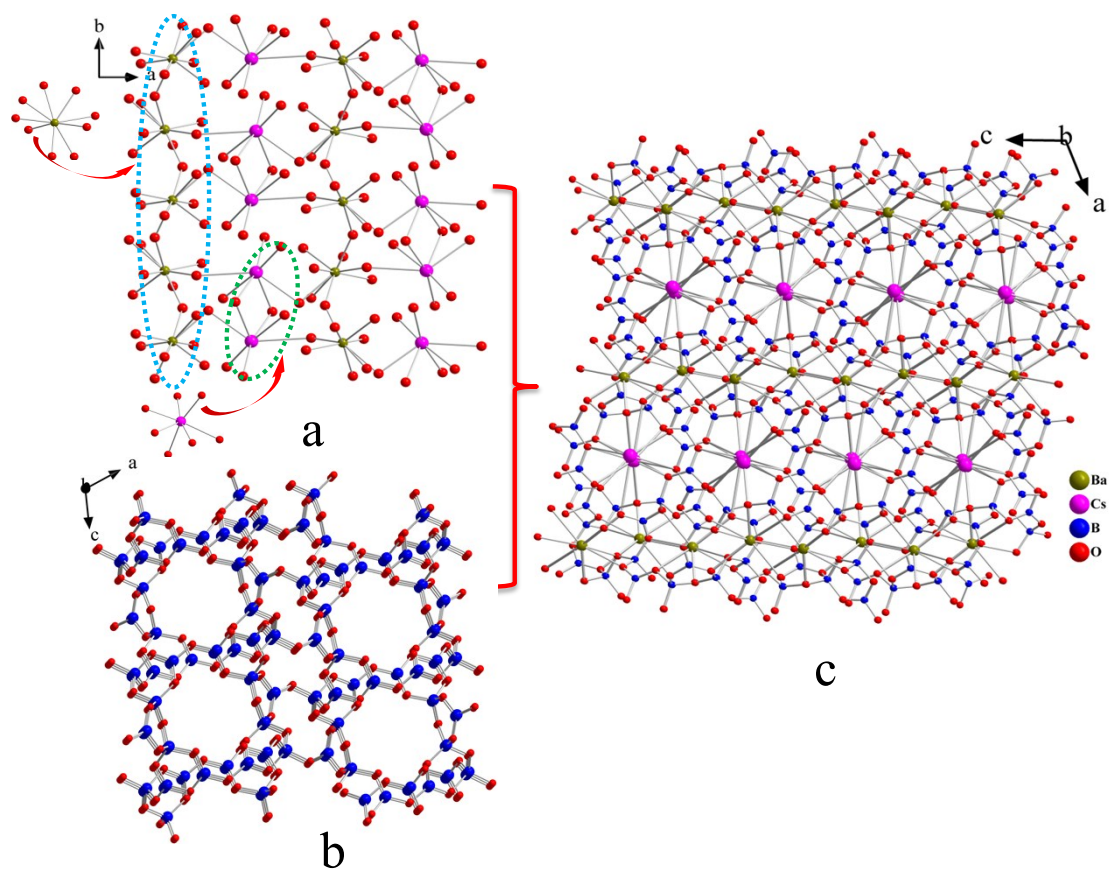

**Figure S2.** (a)  $\infty$ [CsBaO<sub>12</sub>] layer; the  $\infty$ [BaO<sub>8</sub>] chain is surrounded by blue circle; the [Cs<sub>2</sub>O<sub>12</sub>] dimer is surrounded by green circle. (b) The 3D  $\infty$ [B<sub>7</sub>O<sub>12</sub>] anionic open-framework. (c) The whole 3D framework of CsBaB<sub>7</sub>O<sub>12</sub>.

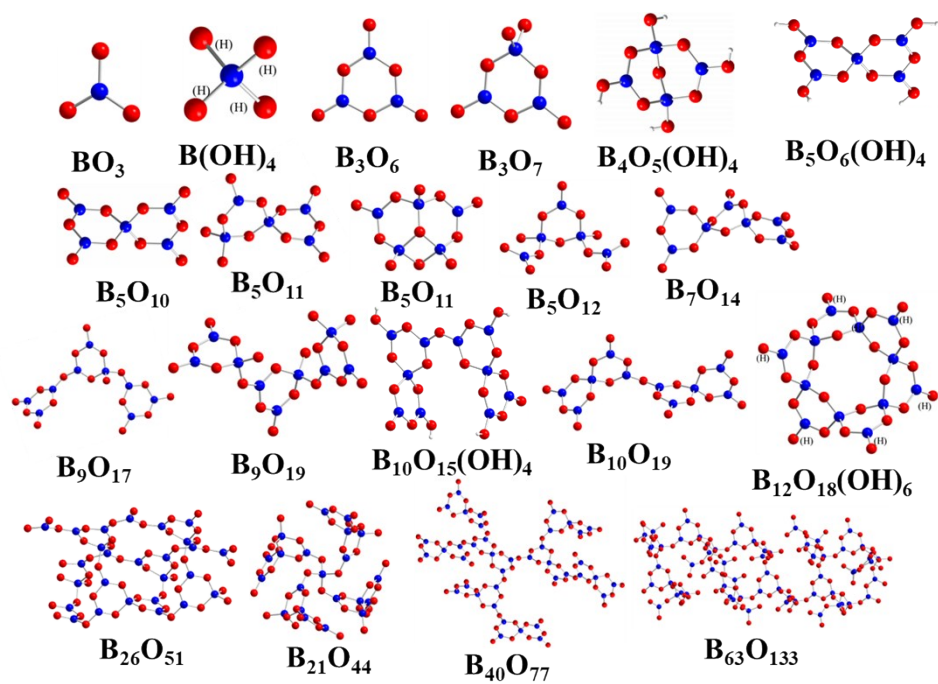

**Figure S3.** The fundamental building blocks (FBBs) of the investigated compounds.

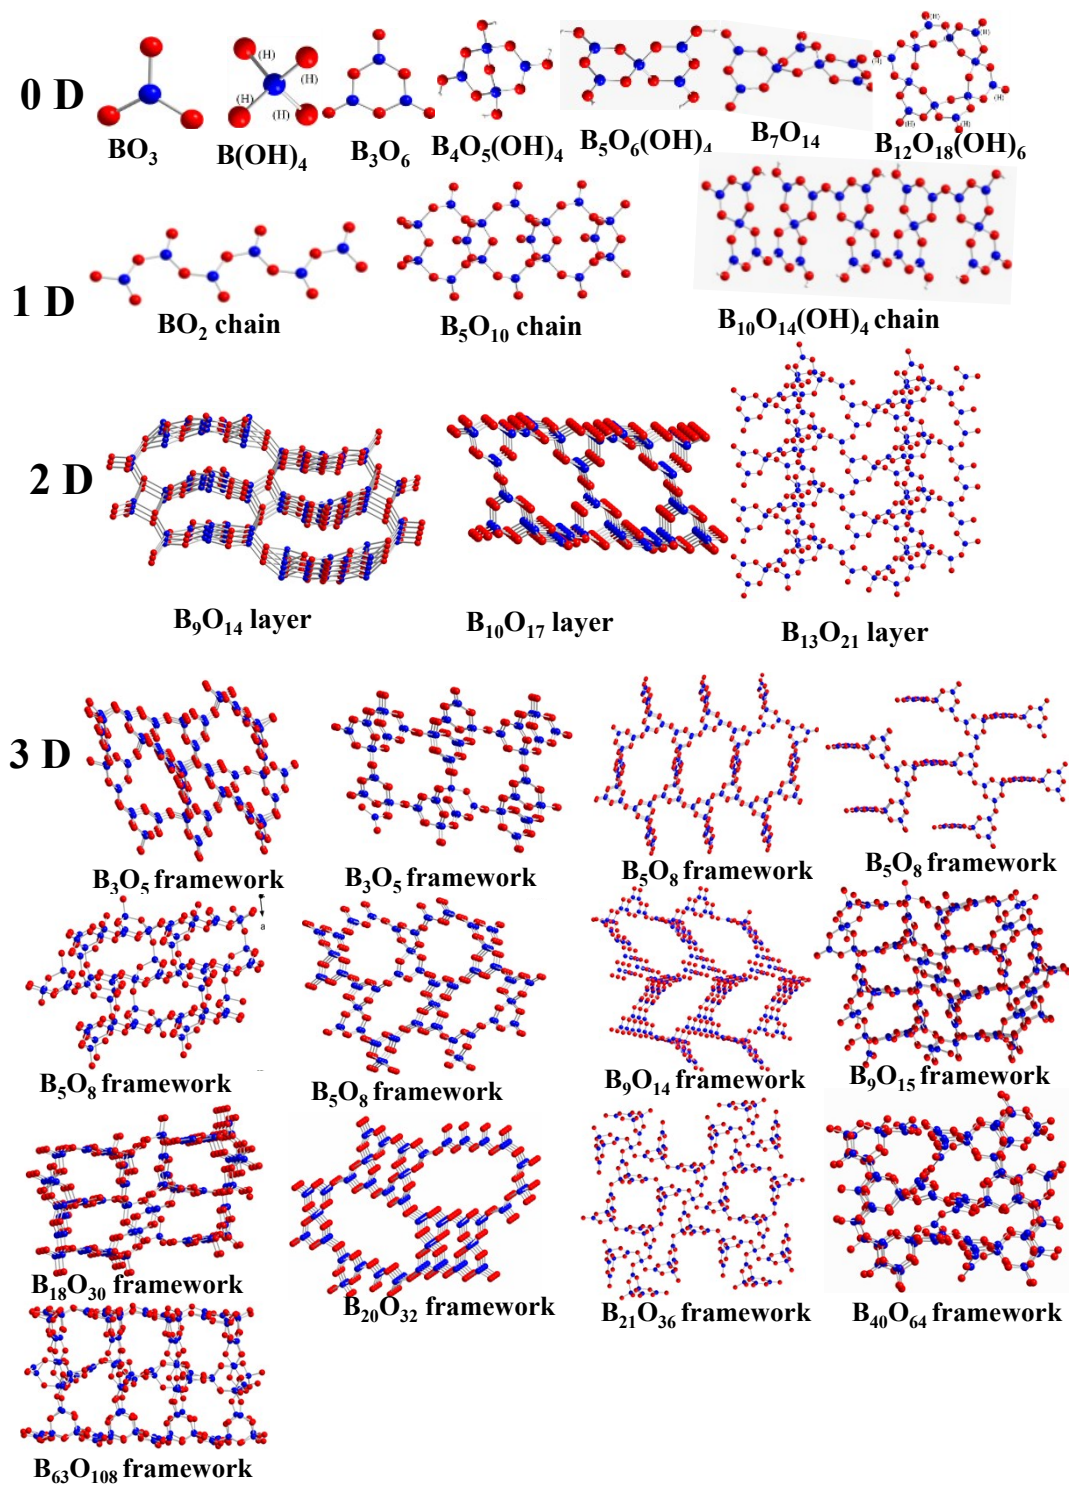

**Figure S4.** The anionic structures of the investigated compounds.

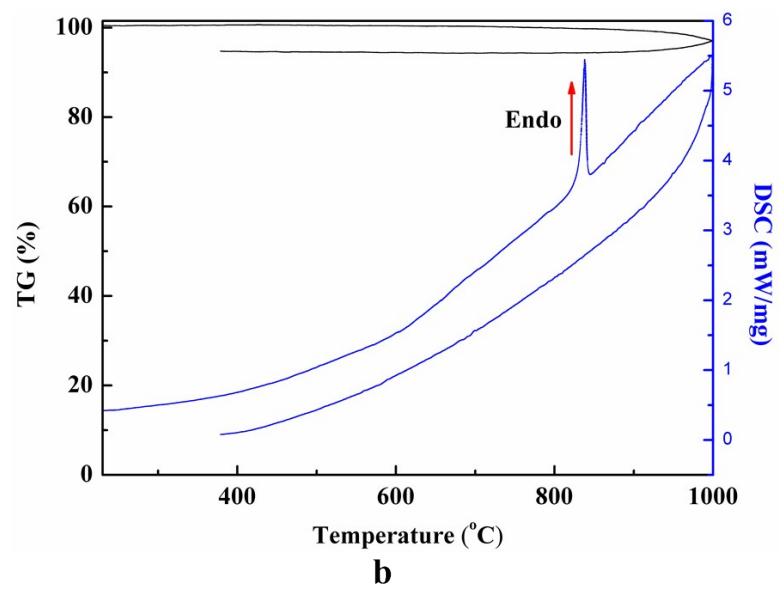

Figure S5. TG-DSC curves of CsBaB<sub>7</sub>O<sub>12</sub>.

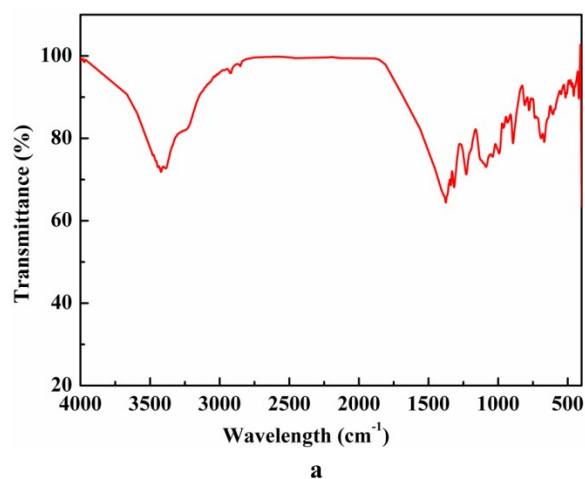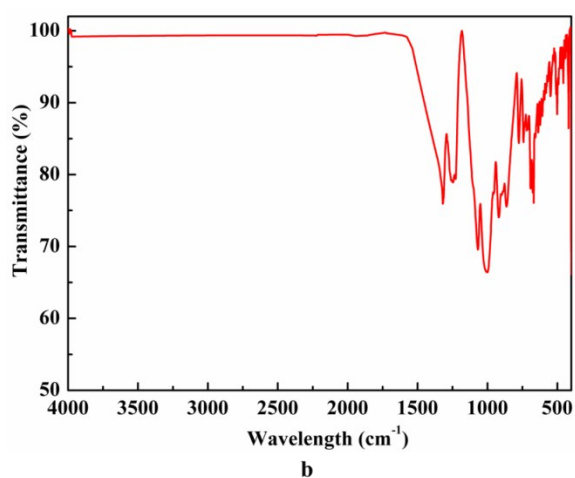

**Figure S6.** (a) The IR spectrum of  $\text{CsB}_7\text{O}_{10}(\text{OH})_2$ . (b) The IR spectrum of  $\text{CsBaB}_7\text{O}_{12}$ .

| Mode description                                        | IR ( $\text{cm}^{-1}$ ) for $\text{CsB}_7\text{O}_{10}(\text{OH})_2$ | IR ( $\text{cm}^{-1}$ ) for $\text{CsBaB}_7\text{O}_{12}$ |
|---------------------------------------------------------|----------------------------------------------------------------------|-----------------------------------------------------------|
| stretching vibrations of OH groups                      | 3382                                                                 | /                                                         |
| asymmetric stretching vibration of $\text{BO}_3$ groups | 1377, 1314, and 1224                                                 | 1317, 1243, 1227                                          |
| asymmetric stretching vibration of $\text{BO}_4$ groups | 1086 and 989                                                         | 1066, 1000 and 914                                        |
| symmetric extension of $\text{BO}_3$ groups             | 886 to 803                                                           | 856                                                       |
| symmetric stretching vibration of $\text{BO}_4$ groups  | 775                                                                  | 737 and 778                                               |
| out-of-plane bending of $\text{BO}_3$ groups            | 671                                                                  | 620 to 720                                                |
| bending of in-plane bending of $\text{BO}_3$ groups     | 595 and 512                                                          | 551                                                       |
| bending of $\text{BO}_4$ groups                         | 400 to 500                                                           | 400 to 500                                                |





## Notes and References

- 1 Z. Wang, M. Zhang, S. L. Pan, Z. H. Yang, H. Zhang, B. B. Zhang, Y. Wang, J. Kang and X. X. Lin, *New J. Chem.*, 2014, **38**, 3035.
- 2 M. Schlager and R. Hoppe, *Aust. J. Chem.*, 1992, **45**, 1427-1439.
- 3 S. Wang and N. Ye, *J. Am. Chem. Soc.*, 2011, **133**, 11458-11461.
- 4 C. Hoch, *Z. Naturforsch. B*, 2011, **66b**, 1248-1254.
- 5 H. W. Huang, W. J. Yao, R. He, C. T. Chen, X. Y. Wang and Y. H. Zhang, *Solid State Sci.*, 2013, **18**, 105-109.
- 6 M. Wen, H. P. Wu, X. Su, J. J. Lu, Z. H. Yang, X. H. Wu and S. L. Pan, *Dalton T.*, 2017, **46**, 4968-4974.
- 7 I. I. Zviedre and A. Ievins, *Latv. PSR Zinat. Akad. Vestis, Kim. Ser*, 1974, **1974**, 401-405.
- 8 M. Miessen and R. Hoppe, *Z. Anorg. Allg. Chem.*, 1986, **536**, 92-100.
- 9 M. Schlager and R. Hoppe, *Z. Anorg. Allg. Chem.*, 1991, **605**, 25-34.
- 10 M. Schliiger and H. Hoppe, *Z. Anorg. Allg. Chem.*, 1994, **620**, 1867-1871.
- 11 G. J. Chen, Y. C. Wu and P. Z. Fu, *J. Solid State Chem.*, 2007, **180**, 2194-2201.
- 12 J. K. MOE, *Acta Crystallogr. B*, 1974, **30**, 1178-1180.
- 13 J.M. Tu and D. A. Keszler, *Mater. Res. Bull.*, 1995, **30**, 209-215.
- 14 A. Sasaki, Y. Mori, I. Kuroda, S. Nakajima, K. Yamaguchi and S. Watanabe, *Acta Crystallogr. C*, 1995, **51**, 2222-2224.
- 15 N. A. Sennova, G. Cordier, B. Albert, S. K. Filatov, R. S. Bubnova, L. I. Isaenko, L. I. Gubenko, J. P. Klöckner and M. H. Prosenc, *Z. Kristallogr. Cryst. Mater.*, 2014, **229**, 741-751.
- 16 J. Krogh-Moe, *Acta Crystallogr. B*, 1974, **30**, 1178-1180.
- 17 J. G. Zhou, F. Y. Zhao, S. P. Xia and S. Y. Gao, *J. Mol. Struct.*, 2004, **688**, 143-148.
- 18 L. X. Zhu, T. Yue, S. P. Xia and K. B. Yu, *J. Alloy. Compd.*, 2004, **372**, 97-102.
- 19 M. Touboul, N. Penin and G. Nowogrocki, *J. Solid State Chem.*, 1999, **143**, 260-265.
- 20 Y. Yang, S. L. Pan, X. L. Hou, C. Y. Wang, K. R. Poeppelmeier, Z. H. Chen, H. P. Wu and Z. X. Zhou, *J. Mater. Chem.*, 2011, **21**, 2890-2894.
- 21 M. Abudourehman, S. J. Han, Y. Wang, Q. Liu, Z. H. Yang and S. L. Pan, *Inorg. Chem.*, 2017, **56**, 13456-13463.
- 22 N. Penin, L. Seguin, B. Gerand, M. Touboul and G. Nowogrocki, *J. Alloy. Compd.*, 2002, **334**, 97-109.
- 23 H. Behm, *Acta Crystallogr. C*, 1984, **40**, 1114-1116.
- 24 M. Mutailipu, M. Zhang, X. Su, Z. Yang, Y. Chen and S. Pan, *Chem. Eur. J.*, 2017, **23**, 13910-13918.
- 25 S. Filatov, R. Bubnova, Y. Shepelev, J. Anderson and Y. Smolin, *Cryst. Res. Technol.*, 2005, **40**, 65-72.
- 26 N. Penin, L. Seguin, M. Touboul and G. Nowogrocki, *J. Solid State Chem.*, 2001, **161**, 205-213.
- 27 R. Bubnova, R. E. Dinnebier, S. Filatov and J. Anderson, *Cryst. Res. Technol.*, 2007, **42**, 143-150.
- 28 G. Sohr, D. M. Töbrens, J. Schmedt auf der Günne and H. Huppertz, *Chem. Eur. J.*, 2014, **20**, 17059-17067.
- 29 J. M. Tu and D. A. Keszler, *Inorg. Chem.*, 1996, **35**, 463-466.
- 30 L. Li, S. J. Han, B. H. Lei, X. Y. Dong, H. P. Wu, Z. X. Zhou, Z. H. Yang and S. L. Pan, *Inorg. Chem.*, 2015, **54**, 7381-7387.
- 31 Y. Yang, S. L. Pan, H. Y. Li, J. Han, Z. Chen, W. W. Zhao and Z. X. Zhou, *Inorg. Chem.*, 2011, **50**, 2415-2419.
- 32 N. Penin, M. Touboul and G. Nowogrocki, *J. Solid State Chem.*, 2003, **175**, 348-352.

- 33 S. J. Han, C. M. Huang, A. Tudi, S. S. Hu, Z. H. Yang and S. L. Pan, *Chem. Eur. J.*, 2019, **25**, 11614-11619.
- 34 J. Krogh-Moe, *Acta Crystallogr.*, 1967, **23**, 427-430.
- 35 X. Chen, L. Wu, K. Wang, X. Chang and W. Xiao, *J. Alloy. Compd.*, 2015, **623**, 157-163.
- 36 A. Q. Jiao, H. W. Yu, H. P. Wu, S. L. Pan and X. W. Zhang, *Inorg. Chem.*, 2014, **53**, 2358-2360.
- 37 L. Q. Li, Q. Song, P. Li, H. S. Huang and Z. H. Liu, *J. Therm. Anal. Calorim.*, 2014, **116**, 1019-1025.
- 38 T. J. Zhang, R. Pan, H. He, B. F. Yang and G. Y. Yang, *J. Clust. Sci.*, 2015, **27**, 625-633.
- 39 N. Penin, L. Seguin, M. Touboul and G. Nowogrocki, *Solid State Sci.*, 2002, **4**, 67-76.
- 40 M. Mutailipu, M. Zhang, X. Su, Z. H. Yang and S. L. Pan, *Inorg. Chem.*, 2017, **56**, 5506-5509.
- 41 G. Nowogrocki, N. Penin and M. Touboul, *Solid State Sci.*, 2003, **5**, 795-803.
